# Supplementary material
Source: publisher figshare collection journal article supplement (https://tandf.figshare.com/ndownloader/files/22257801)
Supplement: Supplementary file 1 [file 22257801]

**Supplementary Figure 1. Percentage of Patients Who Persisted with Index Biologic for 24 Months from Sensitivity Analyses (n=996)**


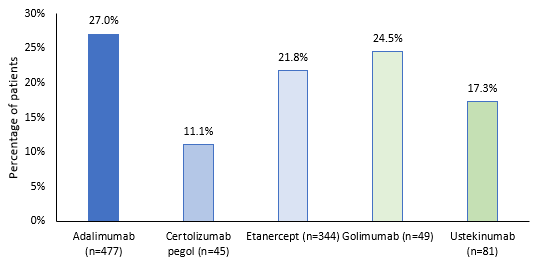


Note: Discontinuation of the index biologic was defined as a gap of ≥90 days between the end of days of supply of one prescription and the date of next prescription for all index biologics.
